# Supplementary material for: A pixelated liquid perovskite array for high-sensitivity and high-resolution X-ray imaging scintillation screens
Source: Royal Society of Chemistry journal article supplement (doi:10.1039/d3nr02841k), 2023-01-01
Supplement: d3nr02841k1.pdf [file d3nr02841k1.pdf]

## **Pixelated liquid perovskite array for high-sensitivity and high-resolution X-ray imaging scintillation screens**

Mingzhu Hu<sup>1,2,3,§</sup>, Yumeng Wang<sup>1,2,§</sup>, Shengpeng Hu<sup>1,2,§</sup>, Zongpeng Wang<sup>4</sup>, Bi Du<sup>4</sup>, Yanjun Peng<sup>1,2</sup>, Jiawei Yang<sup>1,2</sup>, Yunjie Shi<sup>1</sup>, Dongdong Chen<sup>1,2</sup>, Xi Chen<sup>1,2</sup>, Ziwen Zhuang<sup>1</sup>, Zhixun Wang<sup>6</sup>, Xi Chen<sup>1,5</sup>, Jiecheng Yang<sup>7,8</sup>, Yongshuai Ge<sup>7,8</sup>, Eyu Wang<sup>9</sup>, Quan Wen<sup>9</sup>, Shuang Xiao<sup>10</sup>, Ming Ma<sup>1,5</sup>, Weimin Li<sup>1,5</sup>, Jie Zhang<sup>1,5</sup>, De Ning<sup>1,5\*</sup>, Lei Wei<sup>6\*</sup>, Chunlei Yang<sup>1,5\*</sup> and Ming Chen<sup>1,5\*</sup>

<sup>1</sup>Shenzhen Institute of Advanced Technology, Chinese Academy of Sciences, Shenzhen 518055, People's Republic of China

<sup>2</sup>Department of Nano Science and Technology Institute, University of Science and Technology of China, Suzhou 215123, People's Republic of China

<sup>3</sup>School of Microelectronics, University of Science and Technology of China, Hefei 230026, People's Republic of China

<sup>4</sup>Shenzhen Angell Technology Co. Ltd., Shenzhen 518057, People's Republic of China

<sup>5</sup>University of Chinese Academy of Sciences, Beijing 100049, People's Republic of China

<sup>6</sup>School of Electrical and Electronic Engineering, Nanyang Technological University, 50 Nanyang Avenue, 639798, Singapore

<sup>7</sup>Paul C Lauterbur Research Center for Biomedical Imaging, Shenzhen Institute of Advanced Technology, Chinese Academy of Sciences, Shenzhen, Guangdong 518055, China

<sup>8</sup>Research Center for Medical Artificial Intelligence, Shenzhen Institute of Advanced Technology, Chinese Academy of Sciences, Shenzhen, Guangdong 518055, China

<sup>9</sup>Seamark Optoelectronic Technology (Shenzhen) Co. Ltd, Shenzhen, 518103, People's Republic of China

<sup>10</sup>Shenzhen Key Laboratory of Ultraintense Laser and Advanced Material Technology, Center for Advanced Material Diagnostic Technology, and College of Engineering Physics, Shenzhen Technology University, Shenzhen 518118, China

\*Corresponding author: de.ning@siat.ac.cn; wei.lei@ntu.edu.sg; cl.yang@siat.ac.cn; ming.chen2@siat.ac.cn;

§These authors contributed equally to this work

Keywords: perovskite, X-ray imaging, liquid scintillator screen, pixelated, high sensitivity.

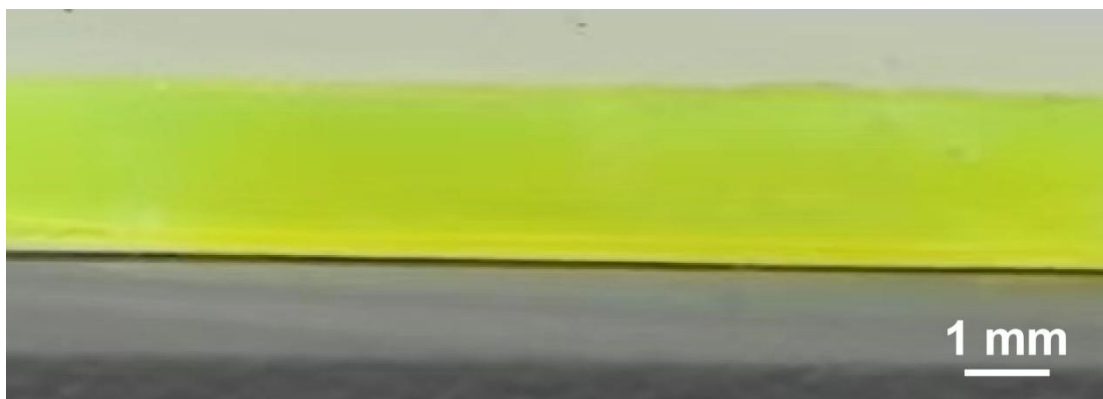

**Figure S1** Cross-sectional image of the pixelated CsPbBr<sub>3</sub>/PPO liquid scintillator arrays

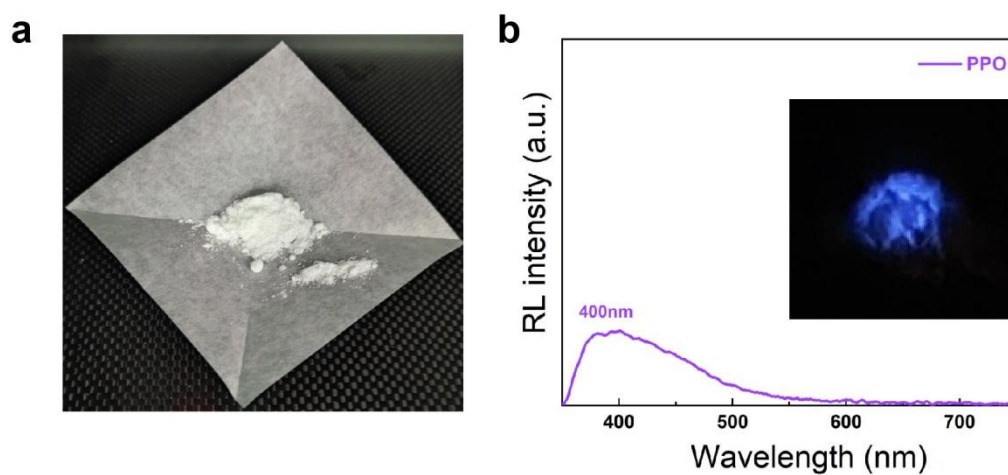

**Figure S2** (a) Photograph of the PPO powder. (b) RL spectra of PPO powder. Inset is the image of PPO under X-ray irradiation.

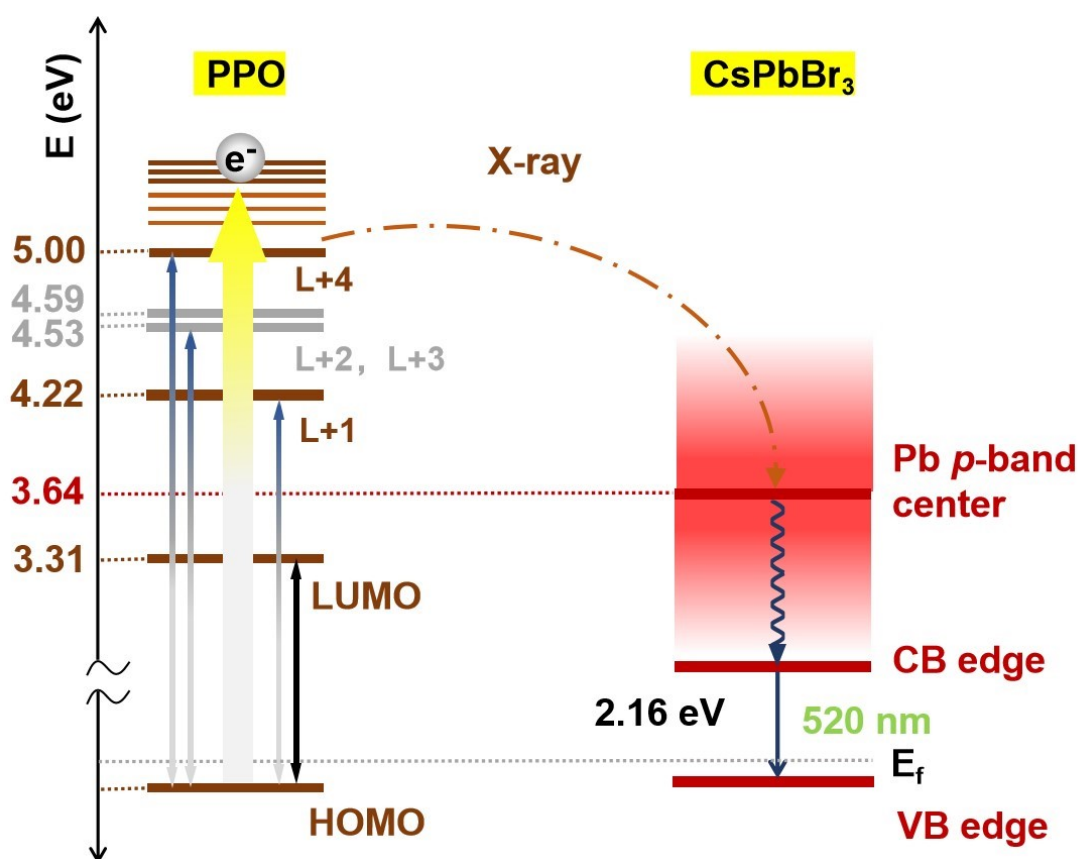

**Figure S3** Energy level alignment for the proposed mechanism of enhanced RL in the CsPbBr<sub>3</sub> QDs/PPO scintillator.

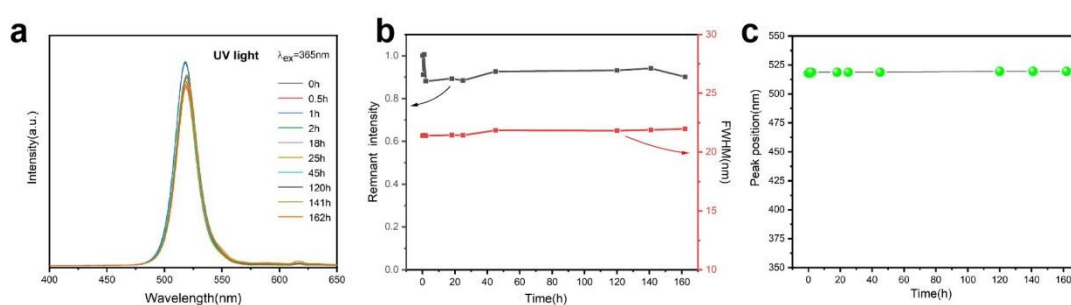

**Figure S4** (a) PL spectrum of CsPbBr<sub>3</sub> QDs/PPO LSS in ambient atmosphere. (b) PL peak intensity and FWHM of CsPbBr<sub>3</sub> QDs/PPO LSS extracted from (a). (c) PL peak position of CsPbBr<sub>3</sub> QDs/PPO LSS extracted from (a).

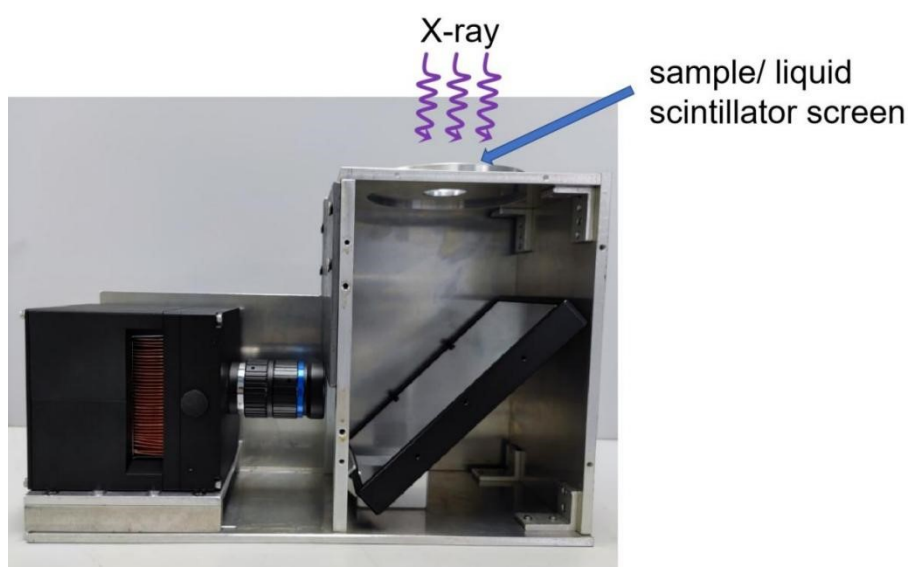

**Figure S5** X-ray imaging optical system.

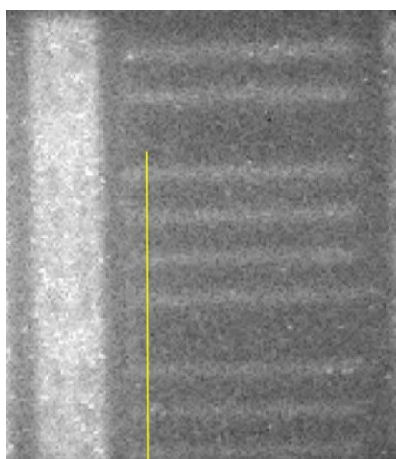

**Figure S6.** X-ray imaging of the standard line-pair card by the pixelated  $\text{CsPbBr}_3/\text{PPO}$  LSS.

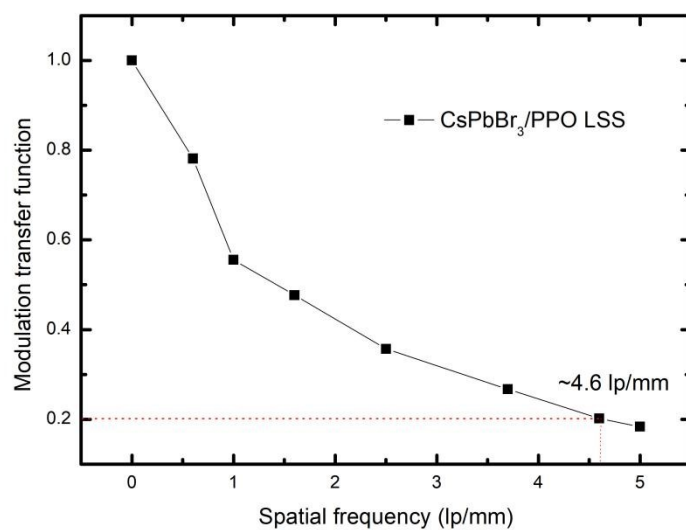

Figure S7. Modulation transfer function (MTF) of CsPbBr<sub>3</sub> QDs/PPO LSS

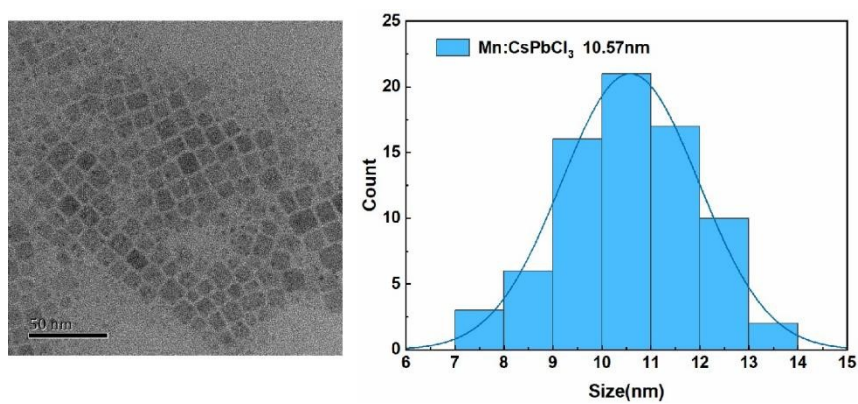

Figure S8 TEM image and particle size distribution of the Mn:CsPbCl<sub>3</sub> QDs

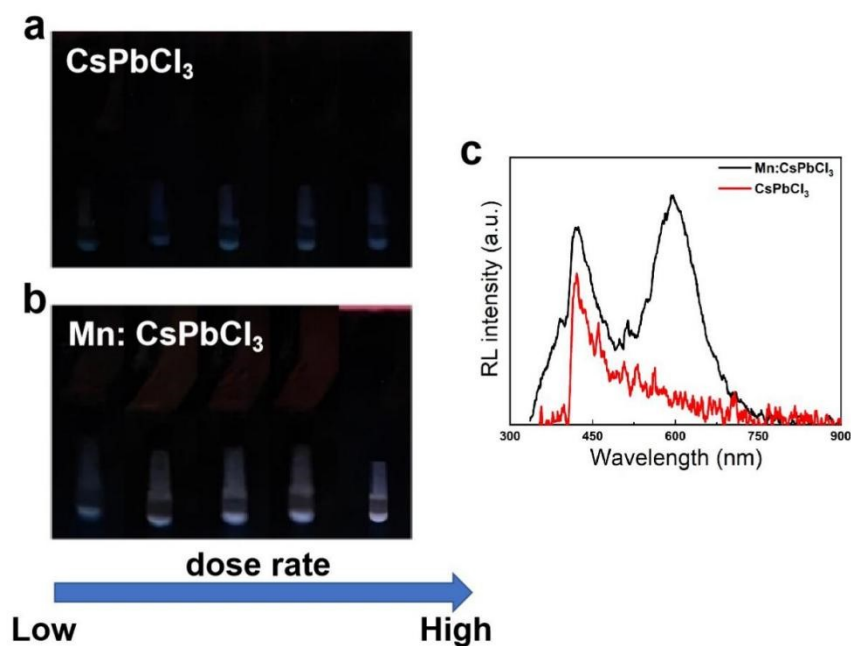

**Figure S9** (a-b) X-ray image of  $\text{CsPbCl}_3$  QDs and  $\text{Mn:CsPbCl}_3$  QDs under X-ray irradiation with different dose rate, respectively. (c) RL spectra of  $\text{CsPbCl}_3$  QDs and  $\text{Mn:CsPbCl}_3$  QDs.

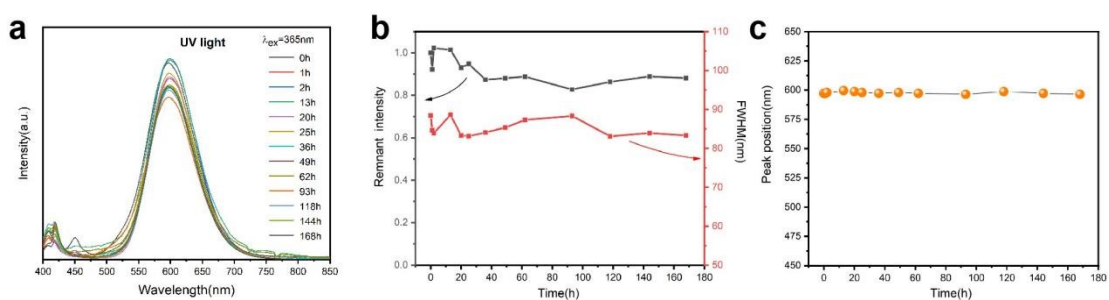

**Figure S10** (a) PL spectrum of  $\text{Mn:CsPbCl}_3$  QDs/PPO LSS in ambient atmosphere. (b) PL peak intensity and FWHM of  $\text{Mn:CsPbCl}_3$  QDs/PPO LSS extracted from (a). (c) PL peak position of  $\text{Mn:CsPbCl}_3$  QDs/PPO LSS extracted from (a).

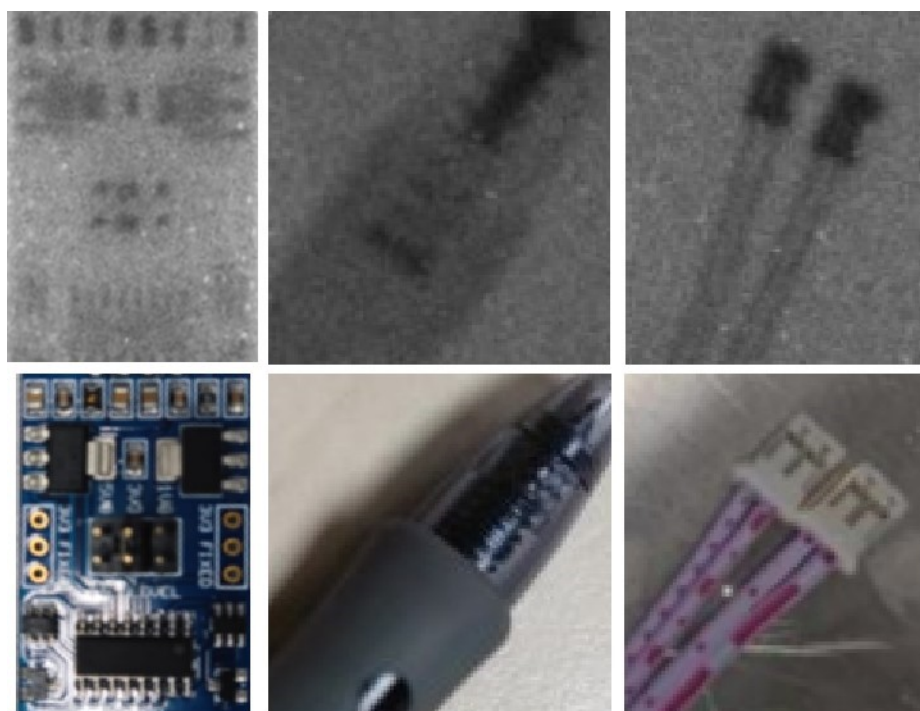

Figure S11. X-ray images and photographs of circuit board, ball-point pen and leadwire using Mn: CsPbCl<sub>3</sub> QDs/PPO LSS.

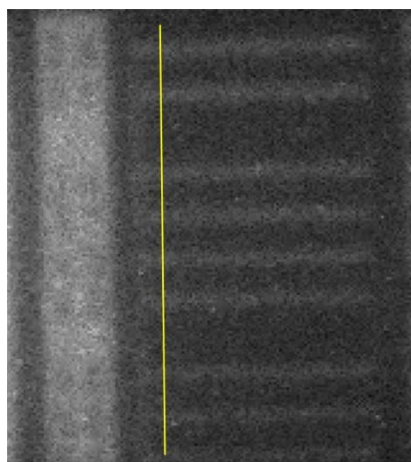

**Figure S12** X-ray imaging of the standard line-pair card by the pixelated Mn: CsPbCl<sub>3</sub>/PPO LSS.

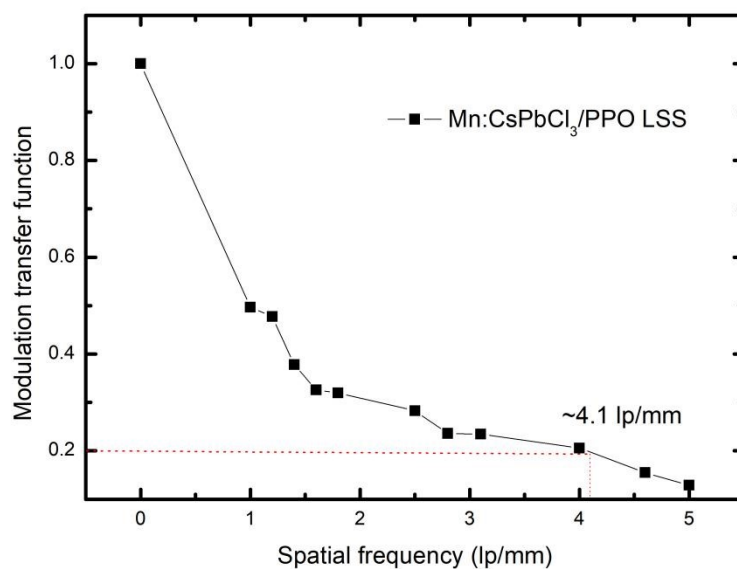

**Figure S13.** MTF of Mn:CsPbCl<sub>3</sub> QDs/PPO LSS

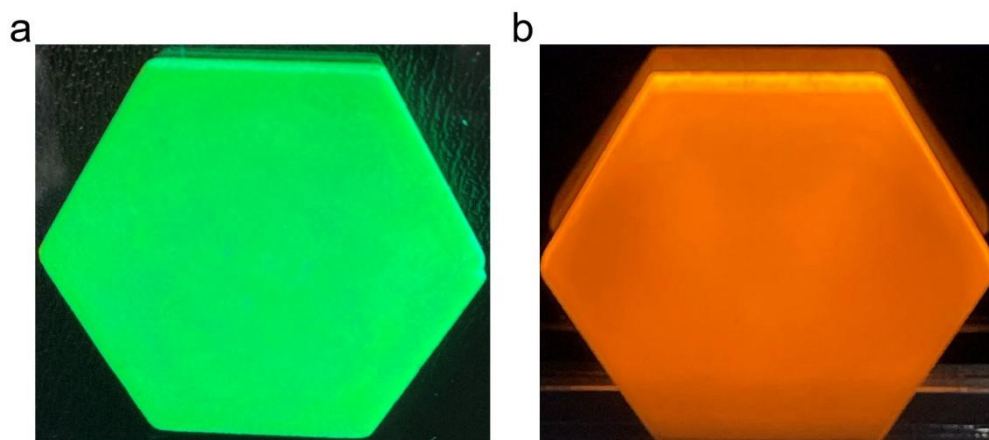

**Figure S14.** (a-b) Optical image of the pixelated CsPbBr<sub>3</sub>/PPO and Mn:CsPbCl<sub>3</sub> QDs/PPO liquid scintillator arrays under UV light excitation after the repeated filling/packaging process, respectively.

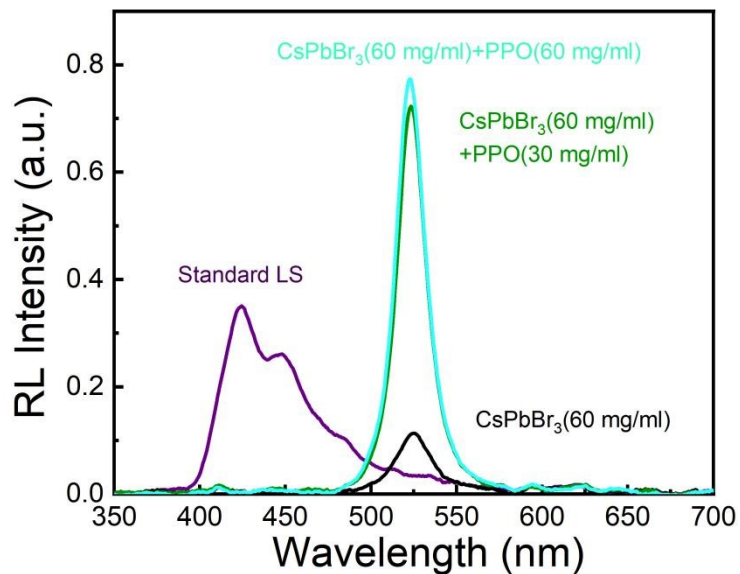

**Figure S15.** RL spectra of standard liquid scintillator (PPO+POPOP+toluene), CsPbBr<sub>3</sub>(60 mg/ml), CsPbBr<sub>3</sub>(60 mg/ml)+PPO (30 mg/ml) and CsPbBr<sub>3</sub>(60 mg/ml)+PPO (60 mg/ml), measured at 90 kV, 89 uA

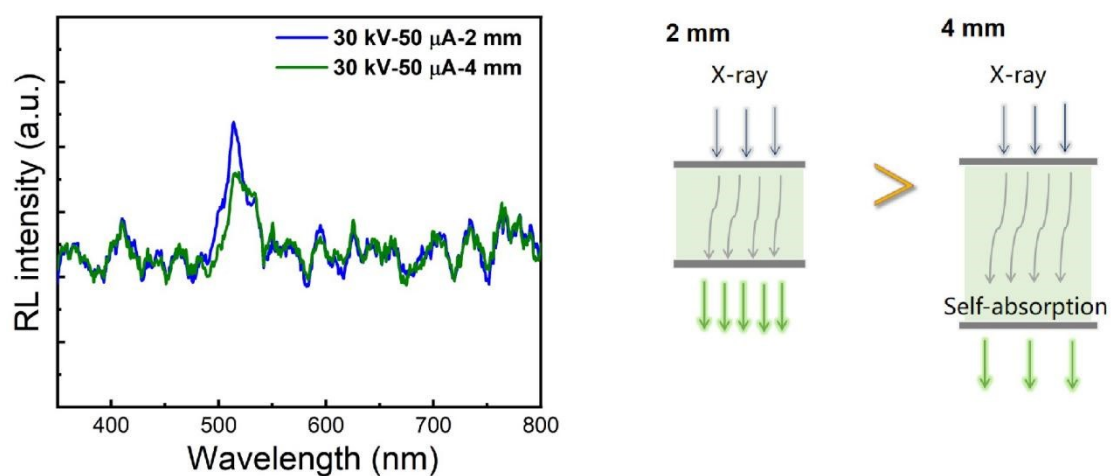

**Figure S16** RL spectra of CsPbBr<sub>3</sub> QDs/PPO LSS with 2 mm and 4 mm thickness (30 kV-50  $\mu$ A).

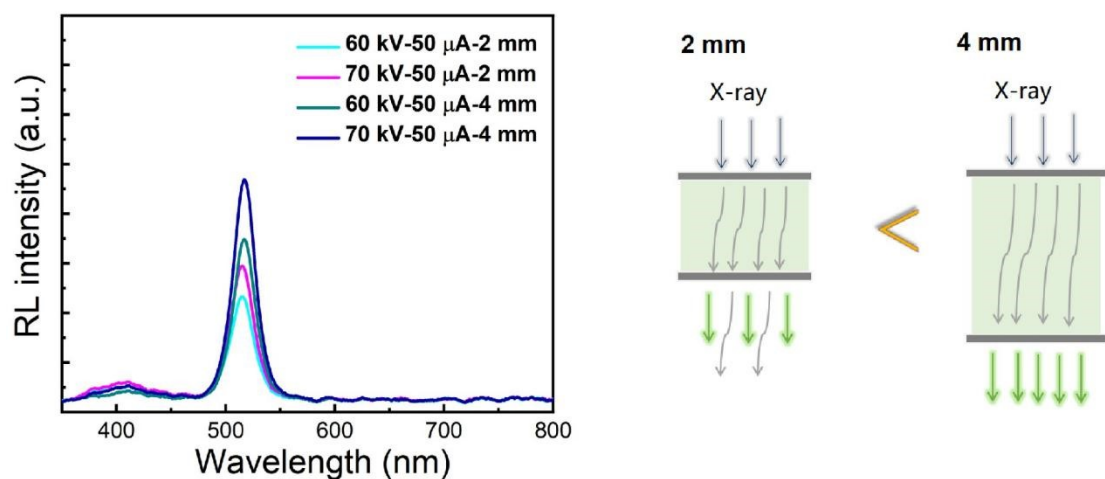

**Figure S17** RL spectra of CsPbBr<sub>3</sub> QDs/PPO LSS with 2 mm and 4 mm thickness (60 kV-50  $\mu$ A and 70 kV-50  $\mu$ A).

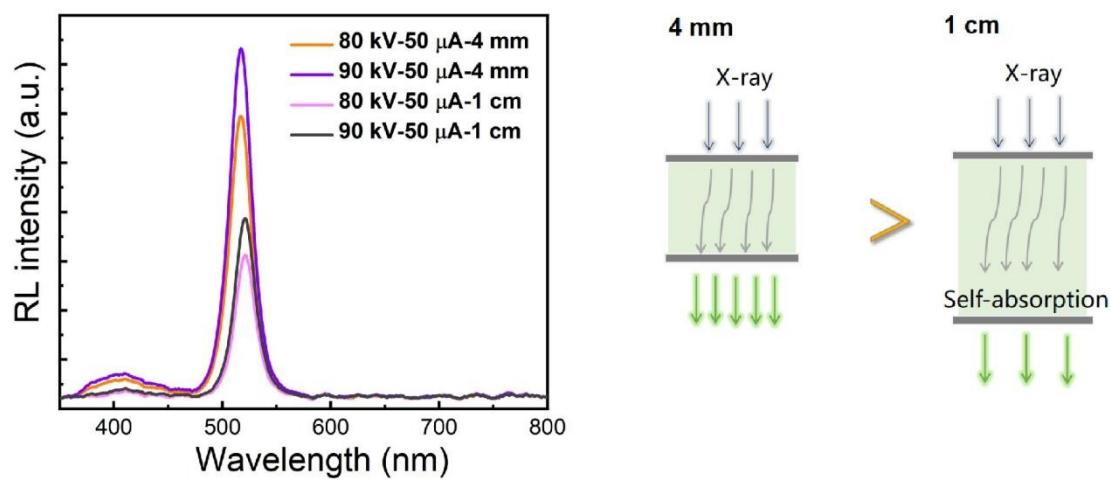

**Figure S18** RL spectra of CsPbBr<sub>3</sub> QDs/PPO LSS with 4 mm and 1 cm thickness (80 kV-50  $\mu$ A and 90 kV-50  $\mu$ A).

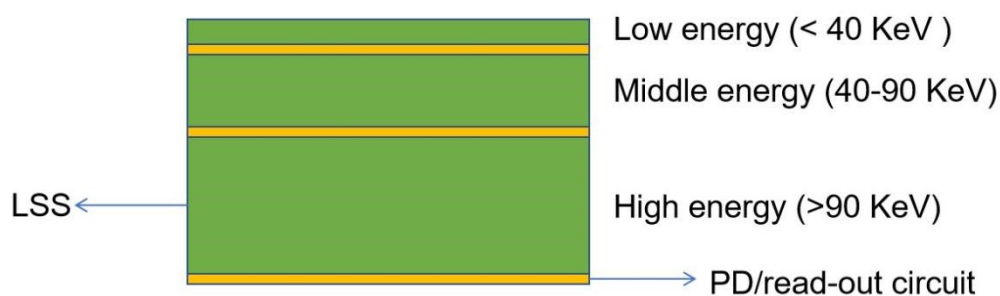

**Figure S19** Schematic diagram of the energy resolved X-ray detector based on the LSS.

**Table S1** Measured dose rate as the function of tube voltage and current.

| Voltage-current         | 20 kV-10 $\mu$ A | 20 kV-20 $\mu$ A | 20 kV-30 $\mu$ A | 20 kV-40 $\mu$ A | 20 kV-50 $\mu$ A | 20 kV-60 $\mu$ A | 20 kV-70 $\mu$ A | 20 kV-80 $\mu$ A | 20 kV-90 $\mu$ A | 20 kV-100 $\mu$ A |
|-------------------------|------------------|------------------|------------------|------------------|------------------|------------------|------------------|------------------|------------------|-------------------|
| Dose rate ( $\mu$ Gy/s) | 15.25            | 29.72            | 44.17            | 58.61            | 73.33            | 88.89            | 102.78           | 119.44           | 130.56           | 144.63            |

| Scintillator                                              | Light yield<br>(Photons/keV) |      |
|-----------------------------------------------------------|------------------------------|------|
| CsI(Tl) : Commercial Solid                                | 54.0                         | 473% |
| NaI(Tl) : Commercial Solid                                | 38.0                         | 330% |
| Standard LS : PPO+POPOP+toluene                           | 11.4                         | 100% |
| Hybrid LS : CsPbBr <sub>3</sub> (60 mg/ml)+PPO (30 mg/ml) | 9.6                          | 84%  |
| Hybrid LS : CsPbBr <sub>3</sub> (60 mg/ml)+PPO (60 mg/ml) | 10.6                         | 93%  |
| CsPbBr <sub>3</sub> (60mg/ml)                             | 3.0                          | 27%  |

**Table S2.** Comparison of the light yield of various solid and liquid scintillators. The light yield of the standard PPO+POPOP+toluene is known, then the light yield values of other liquid scintillators were evaluated versus to that of the standard PPO+POPOP +toluene scintillator. The efficiency of the commercial CsI and NaI solid scintillator were obtained from Ref. (Tsipenyuk, Y. M. Physical methods, instruments and measurements, Volume II, p. 71).
